# Supplementary material
Source: PubMed Central journal article supplement (PMC4402500)
Supplement: thnov05p0772s1.pdf [file thnov05p0772s1.pdf]

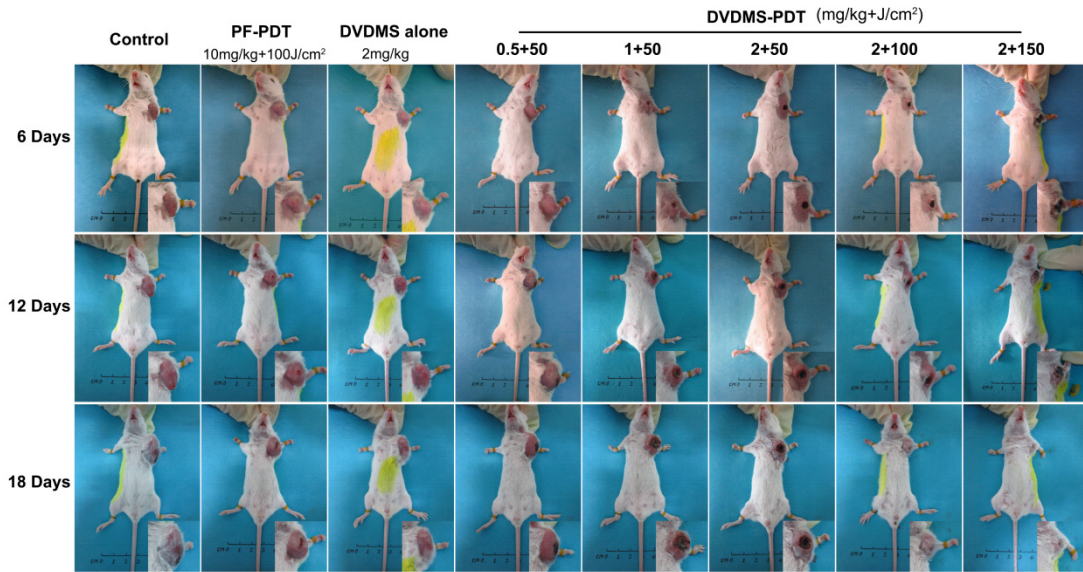

**Supplementary Figure S1. Photographs of 4T1-bearing mice in different groups at 6, 12, 18 days after different treatments.**

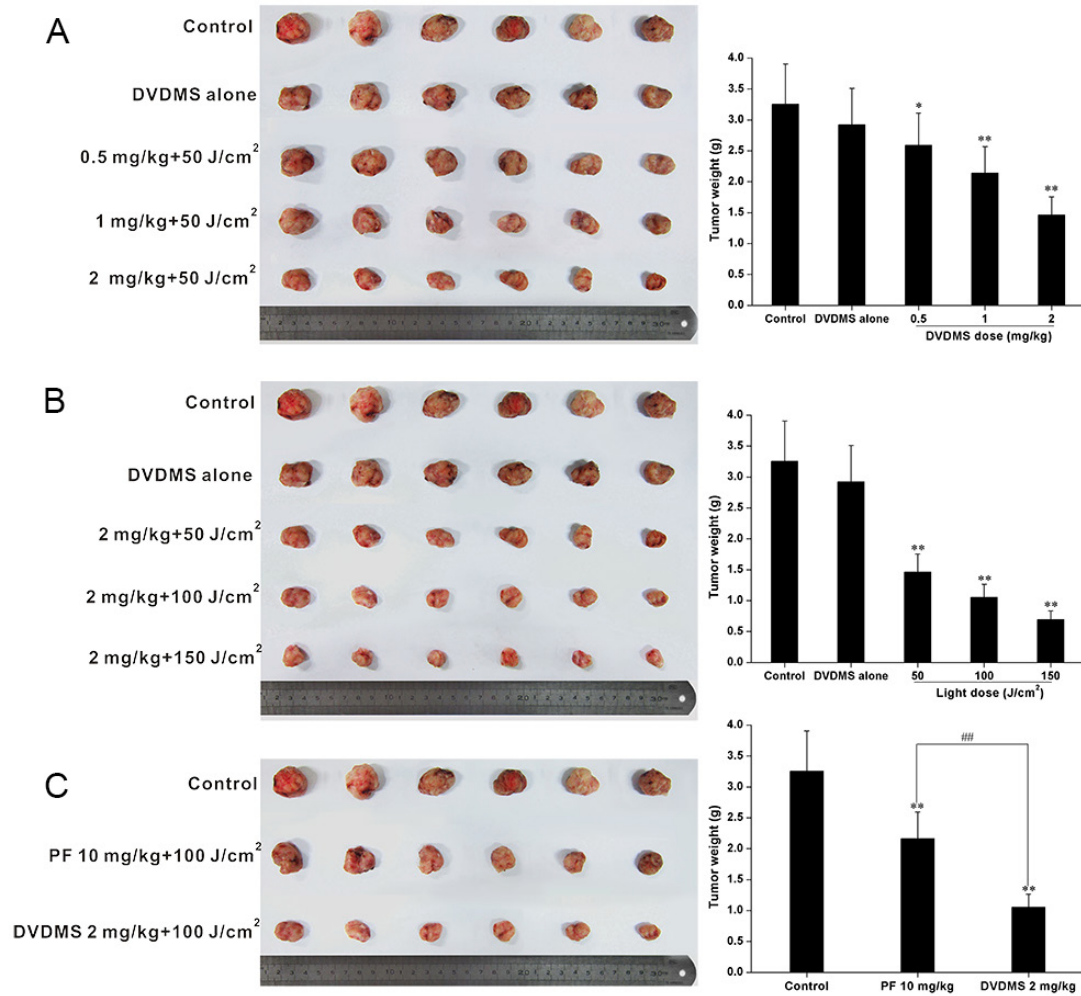

**Supplementary Figure S2. Images of tumors excised from each group of mice 19 days after treatment.** The tumors were weighed and the average weight was calculated. A: 4T1-bearing mice were treated with 50 J/cm<sup>2</sup> light and different DVDMS dose (0.5, 1, 2 mg/kg). B: 4T1-bearing mice were treated by 2 mg/kg DVDMS combined with different light dose (50, 100, 150 J/cm<sup>2</sup>). C: 4T1-bearing mice were treated by 2 mg/kg DVDMS or 10 mg/kg PF with 100 J/cm<sup>2</sup> light. \*  $p < 0.05$ , \*\*  $p < 0.01$  versus control and DVDMS alone, ###  $p < 0.01$ , 2 mg/kg DVDMS + 100 J/cm<sup>2</sup> light group versus 10 mg/kg PF+ 100 J/cm<sup>2</sup> light group.
